# Supplementary material for: Oil Conductivity, Electric-Field-Induced Interfacial Charge Effects, and Their Influence on the Electro-Optical Response of Electrowetting Display Devices
Source: MDPI journal article supplement (doi:10.3390/mi11070702), 2020-07-20
Supplement: s1 [file s1]

# Supplementary Materials: Oil Conductivity, Electric-Field-Induced Interfacial Charge Effects, and Their Influence on the Electro-Optical Response of Electrowetting Display Devices

Chengdian Jiang, Biao Tang, Bojian Xu, Jan Groenewold and Guofu Zhou

## EWD Device Fabrication

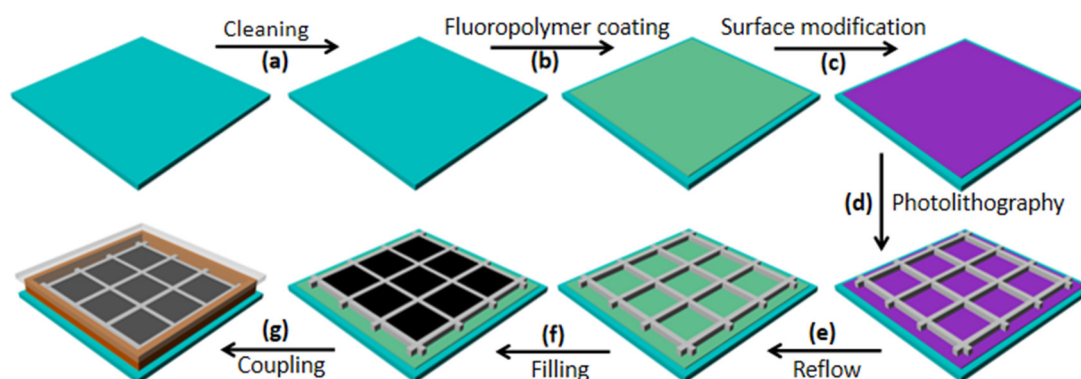

**Figure S1.** Schematic diagram of the EWD device fabrication process. (a) The ITO/glass substrate was cleaned in the standard cleaning line. (b) A layer of Fluoropolymer (FP) was spin-coated on the substrate. (c) The FP surface was activated using reactive ion etching (RIE) to change the hydrophobic state to the hydrophilic state. (d) A layer of n-type photoresist (PR) was then spin-coated on FP. After the photolithography process, the pixel walls were formed. (e) The substrate was heated to reverse the FP surface back to the hydrophobic state. (f) The colored oil was then uniformly filled into the pixels through a raster filling method under water. (g) The cells were filled with water and coupled with a top ITO/glass plate.

## Dyes Information

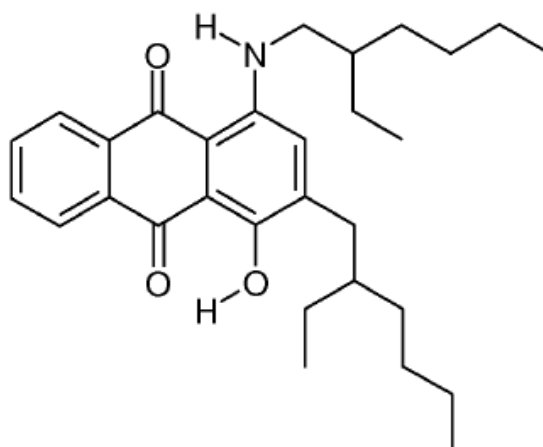

**Figure S2.** Purple dye formula.

Molecular weight of the purple dye is 463, the synthesis process is outlined below: 50 g 1,4-dihydroxyanthraquinone, 1.0 g sodium dodecyl sulfate, 1 L water were mixed in a 2 L reaction flask. Subsequently, 50 g  $\text{Na}_2\text{CO}_3$  and 50 g  $\text{Na}_2\text{S}_2\text{O}_4$  was being added to the flask. The solution was heated

to 80 °C and reacted for 0.5 h. When the solution completely turned to yellow, TLC was used to track the progress of the reaction (n-hexane: acetone = 3,  $R_f$  = 0.68). If the reaction was not completed, more alkali and  $\text{Na}_2\text{S}_2\text{O}_4$  must be added to the solution. After that, the solution was filtered and dried at vacuum (60 °C) to obtain intermediate C'-1 with the yield of 95%. 50 mL isopropanol, 24.2 g (242 g/mol, 0.1 mol) C'-1, 32.0 g (128 g/mol, 0.25 mol) 2-ethylhexanal and 4.35 g (145 g/mol, 0.03 mol) phospholipid acetate were mixed in a three-necked flask with agitation, and the solution was then heated to 80 °C under an  $\text{N}_2$  atmosphere. After reacting for 20 h, the solution was cooled to -20 °C. Then 200 mL industrial ethanol (95%) was poured into the solution, stirred and then cooled for 3 h. The second intermediate C'-2 was obtained with 88.6% yield. 50 mL ethanol (95%), 5.28 g (352 g/mol, 0.015 mol) C'-2, 9.5 g (129 g/mol, 0.073 mol) 2-ethylhexylamine and 1 mL concentrated hydrochloric acid were mixed in a three-necked flask with agitation. Then 1.95 g (65 g/mol, 0.03 mol) zinc powder was added to the solution under an  $\text{N}_2$  atmosphere, the solution was heated to 60 °C and reacted for 2 h. After that, 10 mL of KOH solution (1.6 g, 56 g/mol, 0.03 mol) was slowly poured into the above solution, and the solution was oxidized for 30 min. Solid impurities were removed by filtration, solvent was removed by rotary evaporation, and the product P-1 was purified by column chromatography.

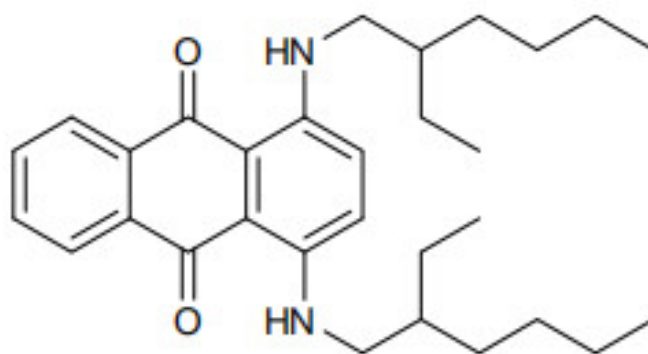

**Figure S3.** Cyan dye formula.

Molecular weight of the cyan dye is 462.

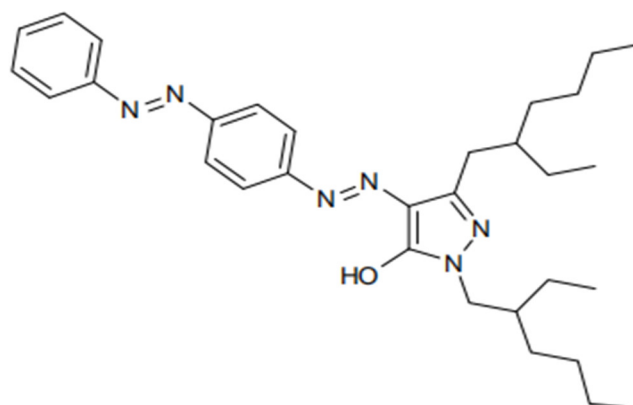

**Figure S4.** Yellow dye formula.

Molecular weight of the yellow dye is 516.

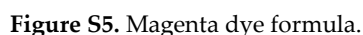

## Device and Microscope Images

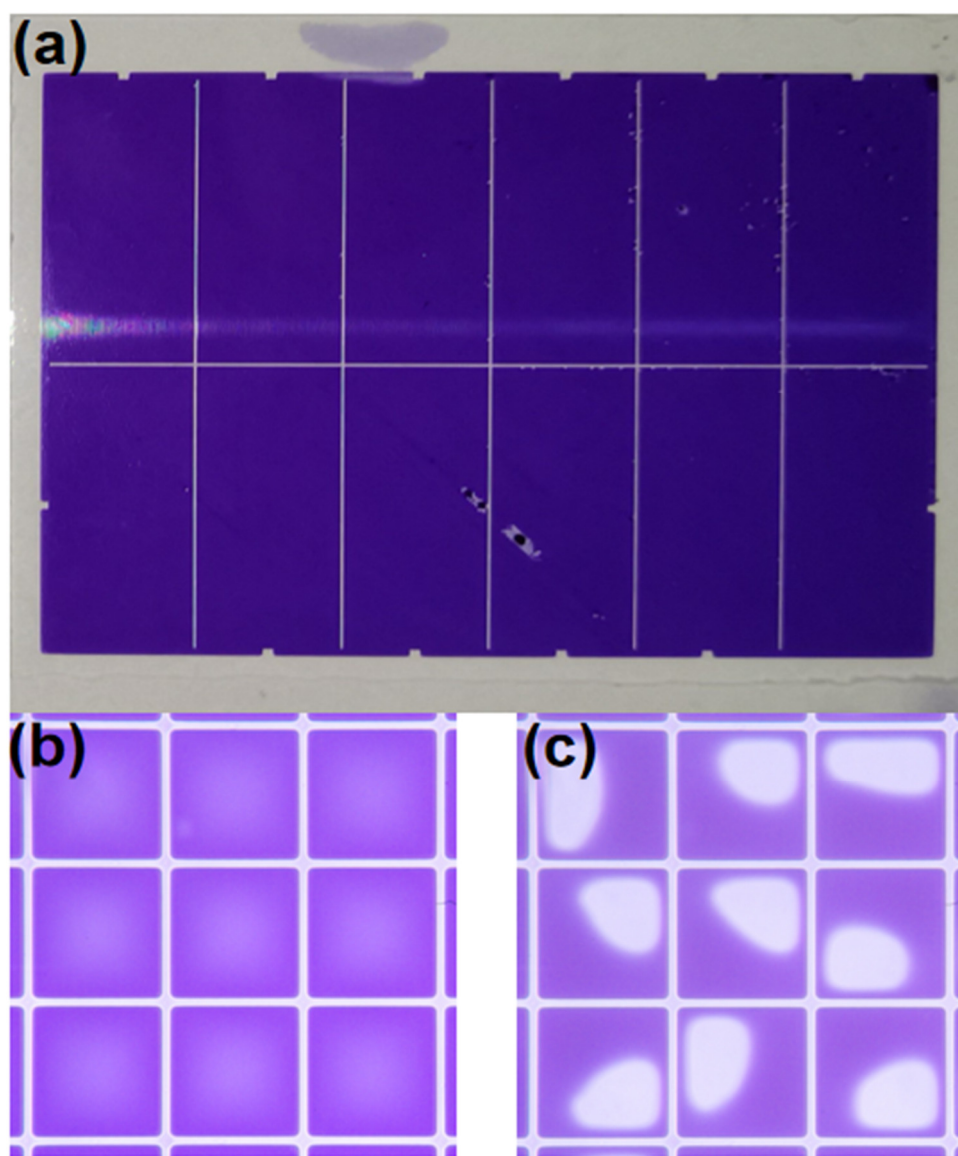

**Figure S6.** (a) Photo of the purple-oil device. (b) Microscopic image showing the close state of the purple-oil device. (c) Microscopic image showing the open state of the purple-oil device.

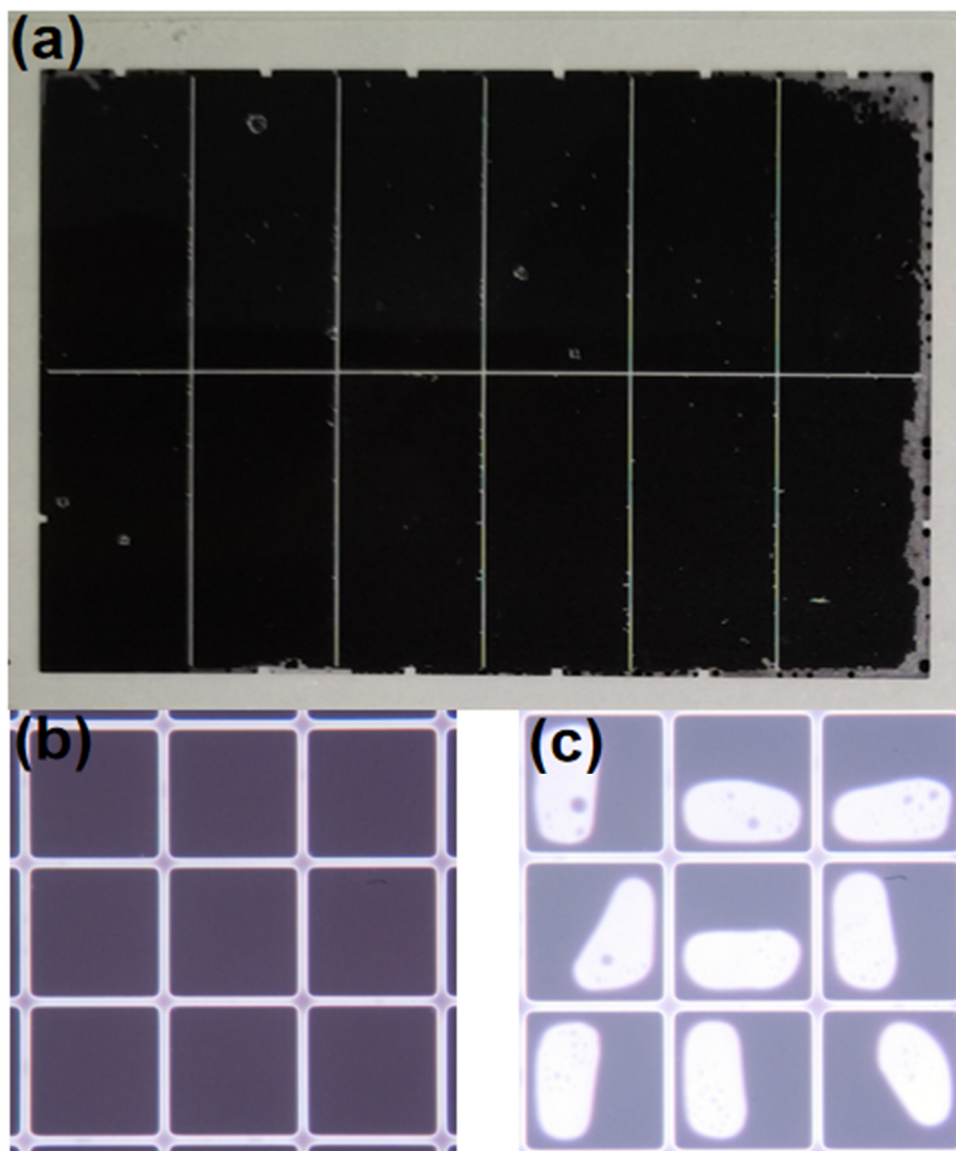

**Figure S7.** (a) Photo of the black-oil device. (b) Microscopic image showing the close state of the black-oil device. (c) Microscopic image showing the open state of the black-oil device.

#### EWOD Sample (for Contact Angle Measurement) Fabrication:

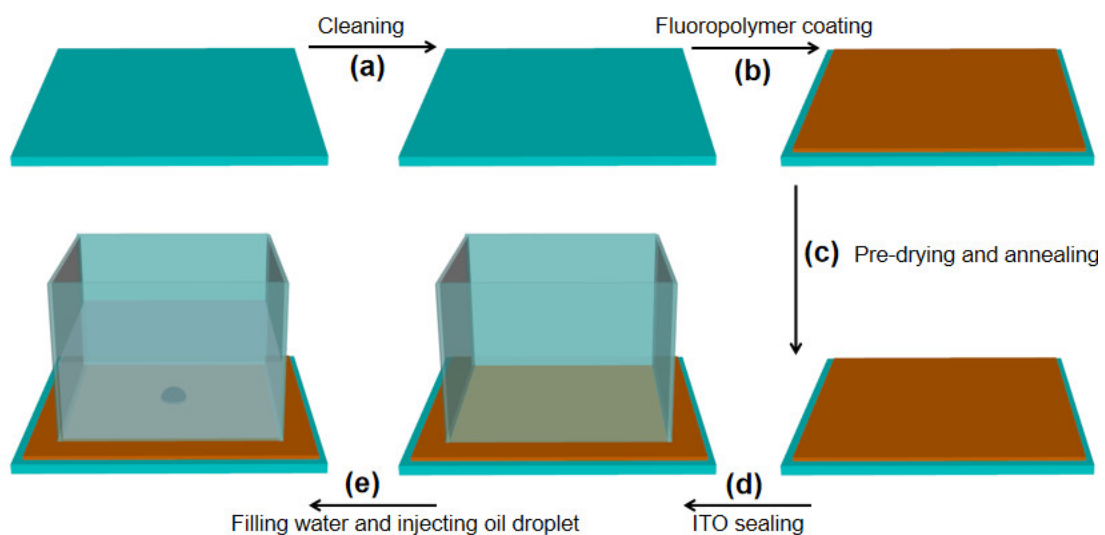

**Figure S8.** Schematic diagram of the EWOD sample fabrication process. **(a)** The ITO/glass substrate was cleaned in the standard cleaning line. **(b)** A layer of Fluoropolymer (FP) was spin-coated (1000 RPM for 60 s) on the substrate. **(c)** The FP layer was pre-dried on hot plate (85 °C) for 3 min, then was annealed in an oven (185 °C) for 30 min. **(d)** The surface of the insulating layer was sealed to form a container. **(e)** Water was filled into the container, and then oil droplet was injected onto the FP substrate.
